# Supplementary material for: Decreased Serum Sirtuin-1 in COPD
Source: PubMed Central journal article supplement (PMC5540026; doi:10.1016/j.chest.2017.05.004), 2017-08
Supplement: mmc1.pdf [file mmc1.pdf]

## Decreased Serum Sirtuin-1 in COPD

*Satoru Yanagisawa, MD, PhD; Andriana I. Papaioannou, MD, PhD;  
Anastasia Papaporfyriou, MD, PhD; Jonathan R. Baker, PhD; Chaitanya Vuppusetty, MSc;  
Stelios Loukides, MD, PhD; Peter J. Barnes, DM, DSc; and Kazuhiro Ito, DVM, PhD*

CHEST 2017; 152(2):343-352

*Online supplements are not copyedited prior to posting and the author(s) take full responsibility for the accuracy of all data.*

e-Figure 1

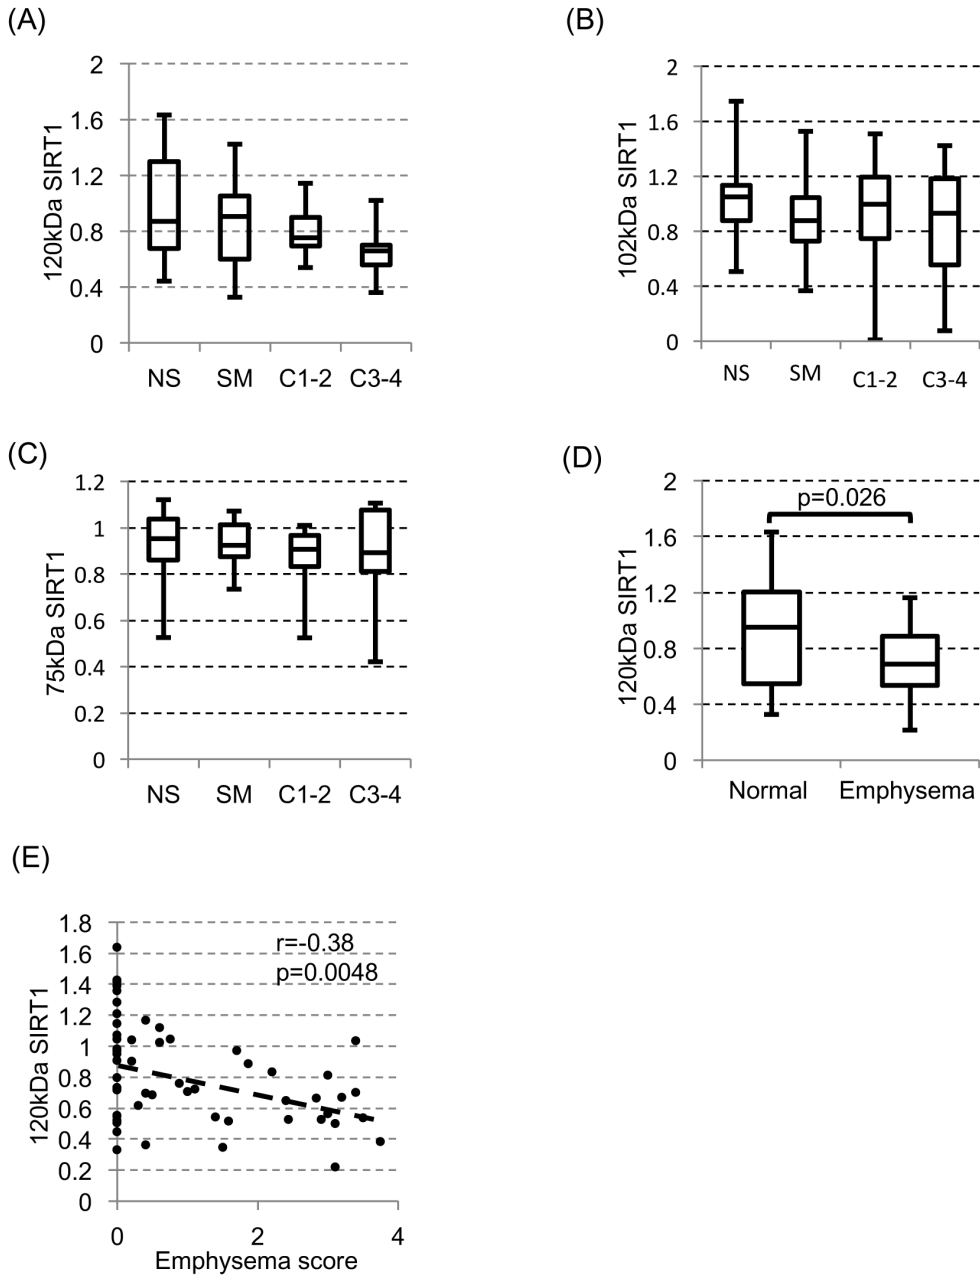

e-Figure 1. Reduced levels of serum 120kDa SIRT1 (s120S) protein in COPD and correlation with Emphysema. The levels of SIRT1 at 120 kDa (A), 102kDa (B) and 75kDa (C) in serum from healthy non-smoker subjects (NS), smokers without COPD (SM) and COPD patients (C1-2 or C3-4 disease stage). Comparison of SIRT1 120KDa between subjects with normal lung and with emphysema (D) and correlation between SIRT1 120KDa and emphysema score in all subjects (E).

**e-Table 1. The Spearman's correlation coefficient rank test between the serum SIRT1 (120kDa) and patient characteristics**

|                                     | COPD Stage 1-2 |       | COPD Stage 3-4 |      |
|-------------------------------------|----------------|-------|----------------|------|
|                                     | r              | p     | r              | p    |
| BMI                                 | 0.35           | 0.22  | 0.32           | 0.26 |
| Pack-year                           | -0.070         | 0.81  | -0.23          | 0.43 |
| FEV <sub>1</sub> /FVC               | 0.38           | 0.19  | -0.0055        | 0.98 |
| Emphysema Score                     | -0.51          | 0.080 | -0.069         | 0.81 |
| Kco % predicted                     | 0.44           | 0.17  | -0.14          | 0.62 |
| FEV <sub>1</sub> % predicted        | 0.18           | 0.53  | 0.47           | 0.10 |
| PaO <sub>2</sub> /PaCO <sub>2</sub> | -0.24          | 0.41  | 0.26           | 0.37 |
| RV % predicted                      | -0.51          | 0.090 | 0.050          | 0.86 |
| IC % predicted                      | -0.83          | 0.018 | 0.25           | 0.46 |
| DLCO % predicted                    | 0.27           | 0.38  | 0.19           | 0.52 |
| PaO <sub>2</sub> / FiO <sub>2</sub> | -0.25          | 0.40  | 0.094          | 0.74 |
| PaO <sub>2</sub>                    | -0.25          | 0.40  | -0.072         | 0.80 |
| 6MWD                                | 0.47           | 0.11  | 0.35           | 0.22 |
| Dsat                                | -0.19          | 0.50  | 0.32           | 0.27 |
| FVC % predicted                     | -0.099         | 0.73  | 0.41           | 0.16 |
| AaDO <sub>2</sub>                   | 0.18           | 0.53  | -0.14          | 0.62 |
| FRC % predicted                     | -0.15          | 0.61  | 0.028          | 0.93 |
| RV/TLC                              | -0.20          | 0.50  | 0.27           | 0.35 |
| PaCO <sub>2</sub>                   | 0.16           | 0.59  | -0.16          | 0.57 |
| TLC % predicted                     | -0.12          | 0.68  | -0.082         | 0.78 |

Abbreviations: r = correlation coefficient; p = probability value.
